# Supplementary material
Source: ML conference proceedings conference paper supplement (https://aclanthology.org/2026.semeval-1.165)

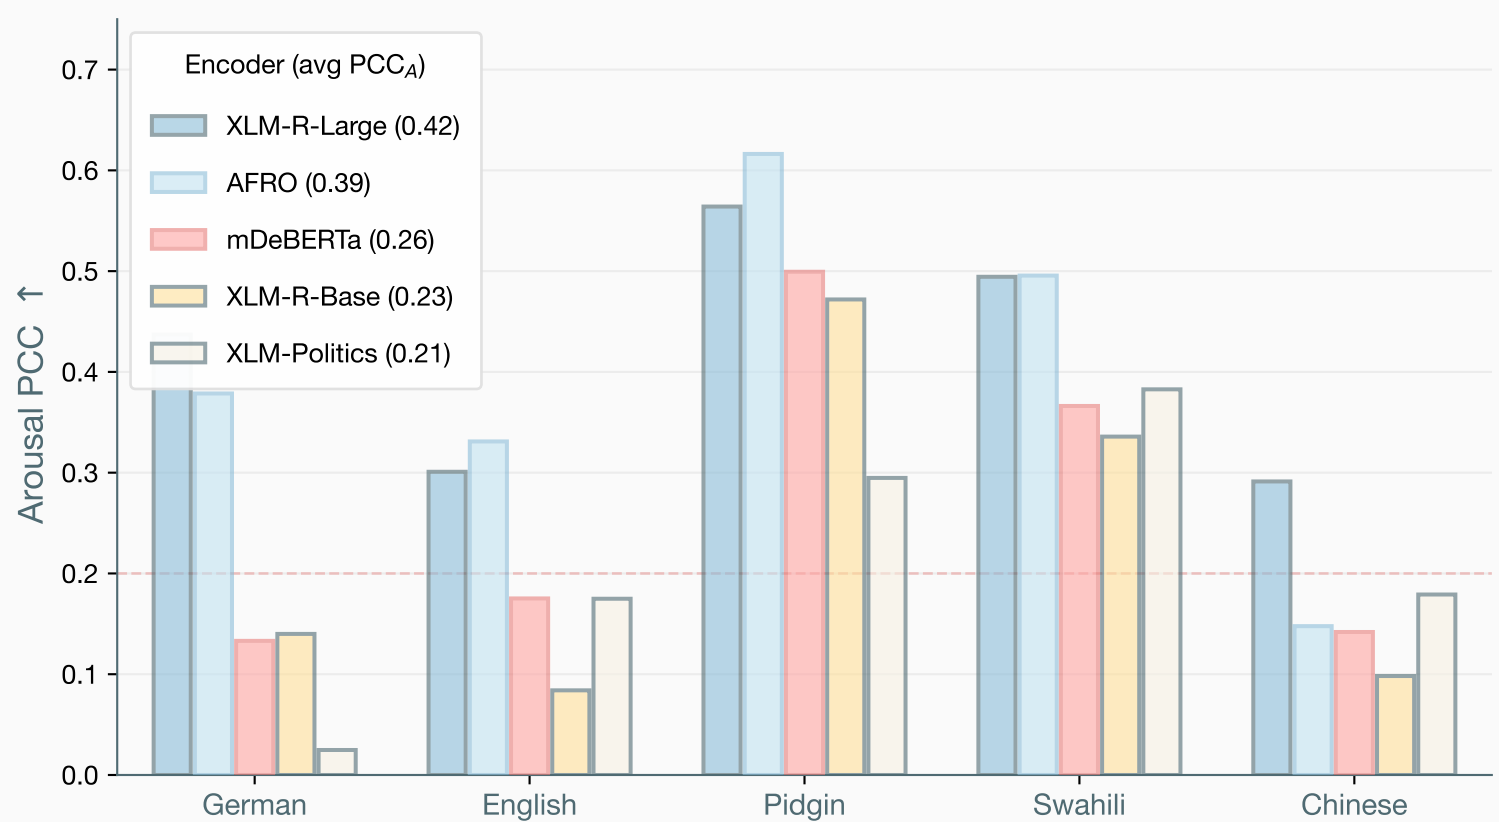

Supplement: SupplementaryMaterial [file encoder_pcc_arousal.pdf › figures/encoder_pcc_arousal.pdf]

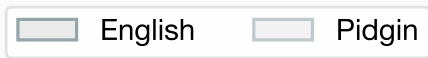

Seed 42

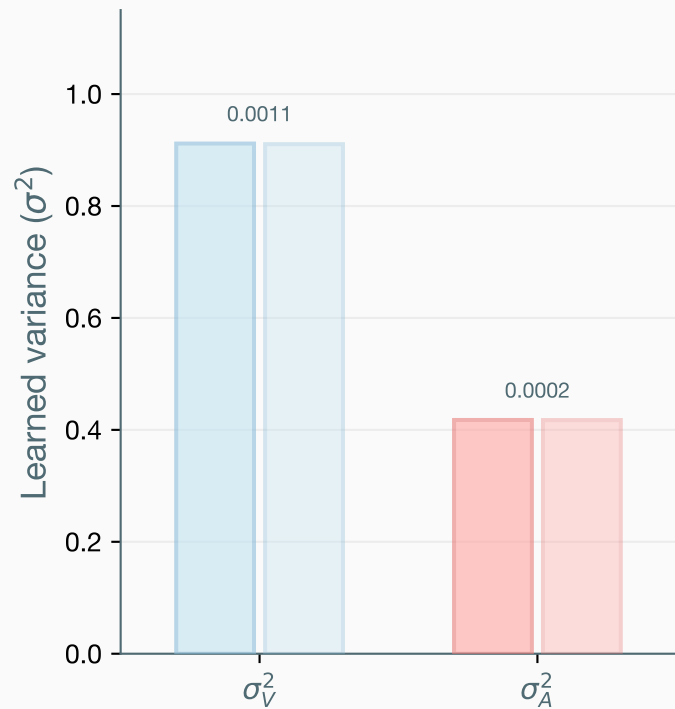

Seed 12

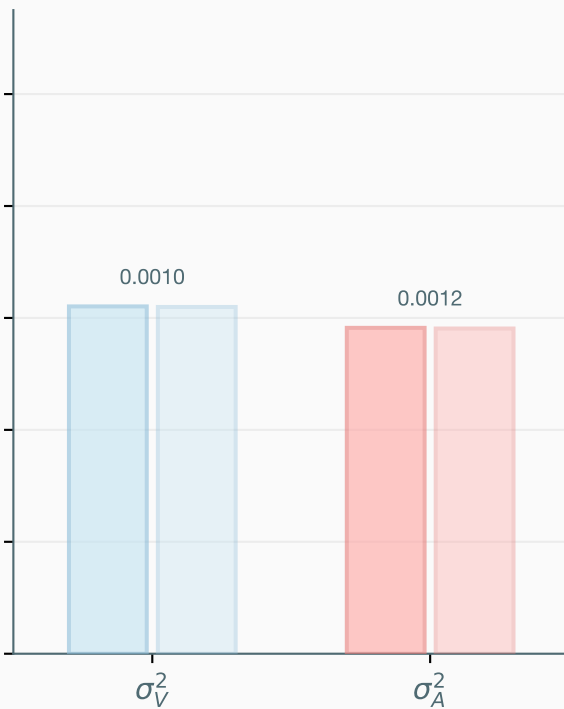

Seed 73

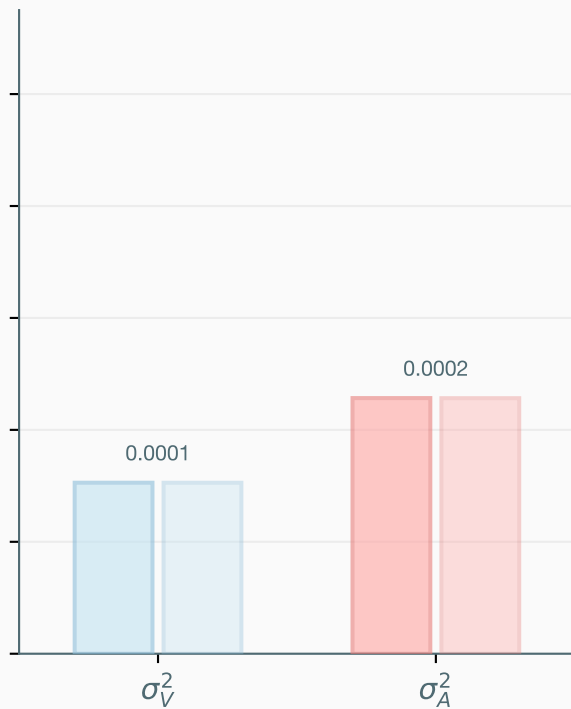

Supplement: SupplementaryMaterial [file eng_pcm_convergence.pdf › figures/eng_pcm_convergence.pdf]

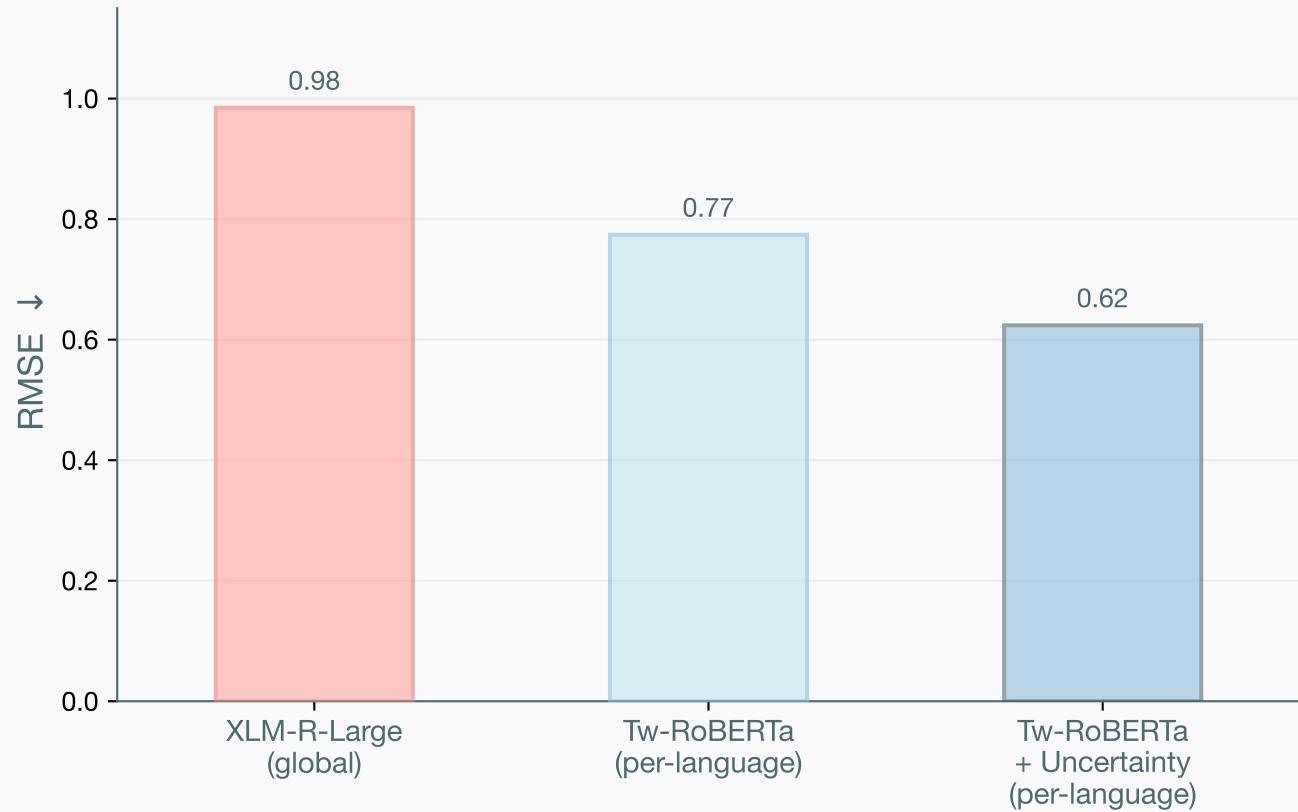

Supplement: SupplementaryMaterial [file pidgin_progression.pdf › figures/pidgin_progression.pdf]

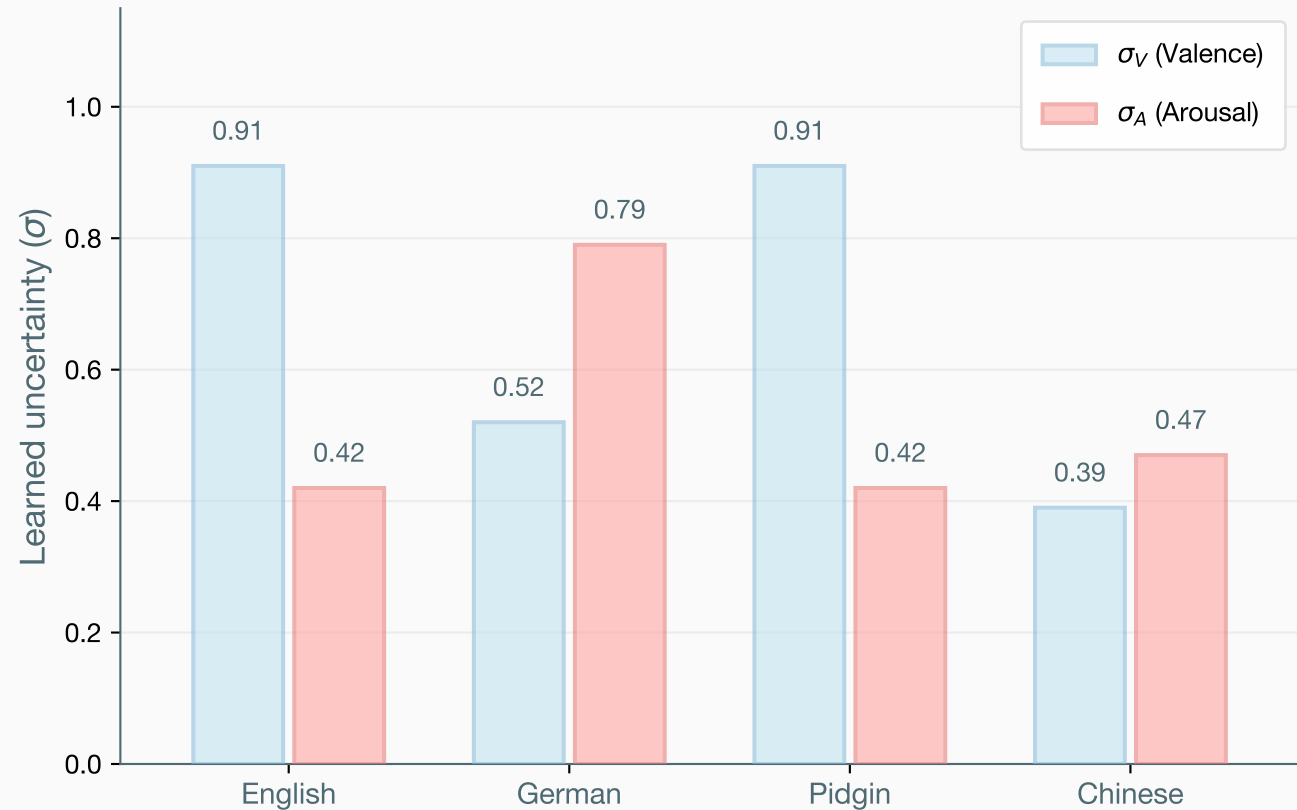

Supplement: SupplementaryMaterial [file sigma_comparison.pdf › figures/sigma_comparison.pdf]

Learned uncertainty ( $\sigma$ )

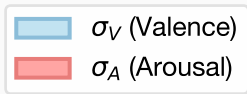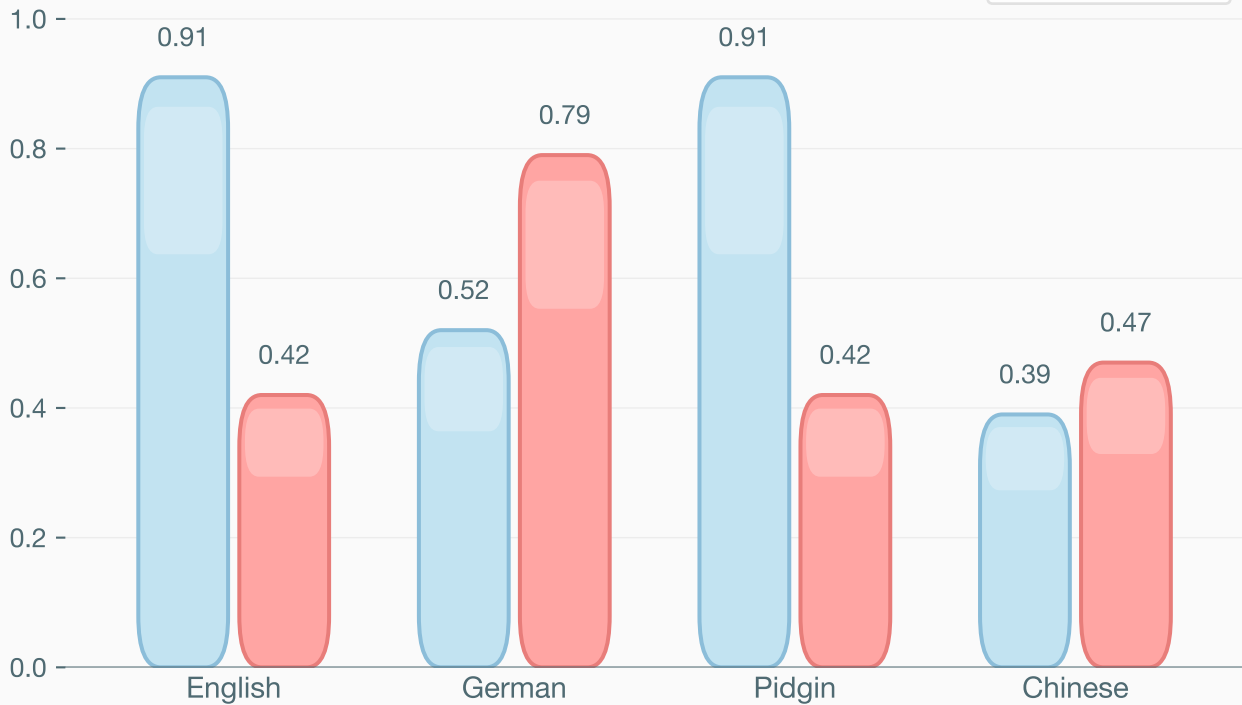

Supplement: SupplementaryMaterial [file sigma_comparisonx.pdf › figures/sigma_comparisonx.pdf]

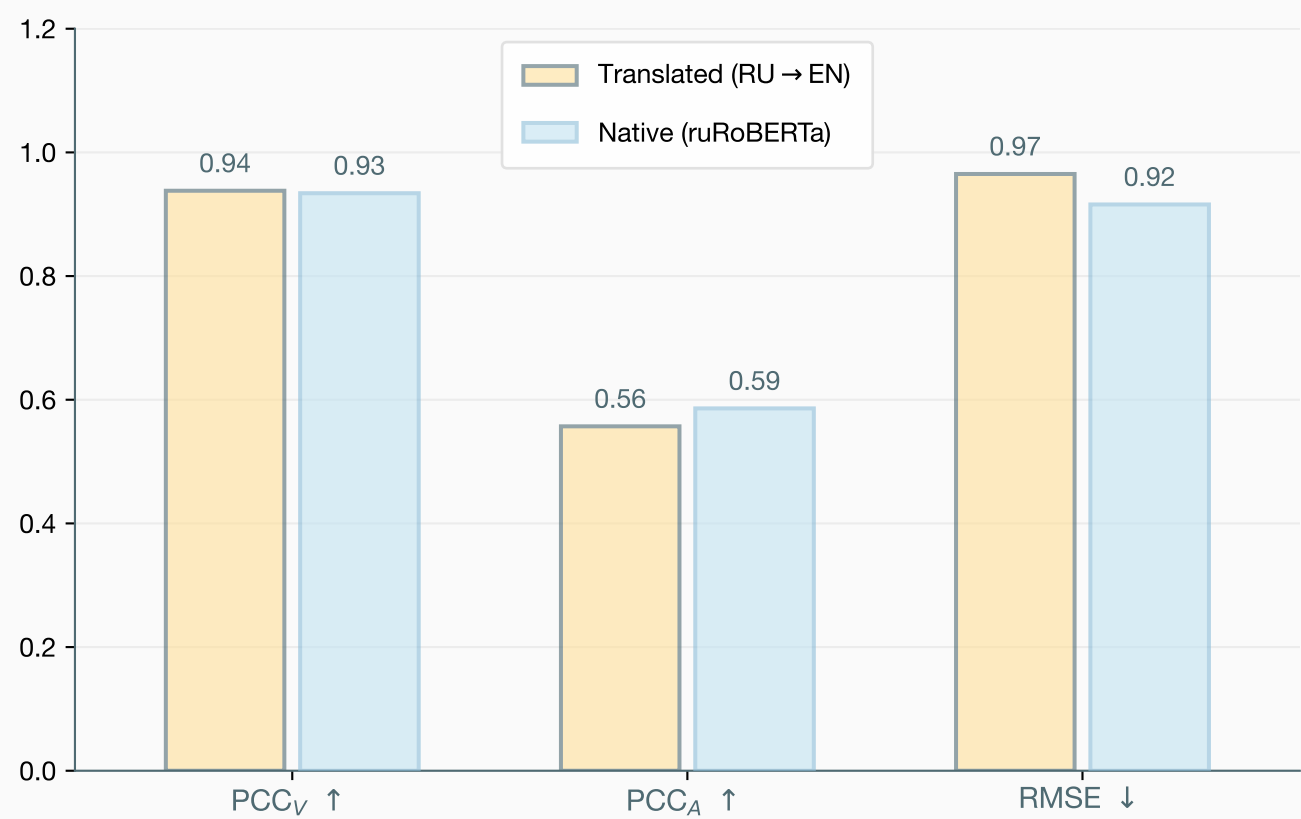

Supplement: SupplementaryMaterial [file translation_vs_native.pdf › figures/translation_vs_native.pdf]

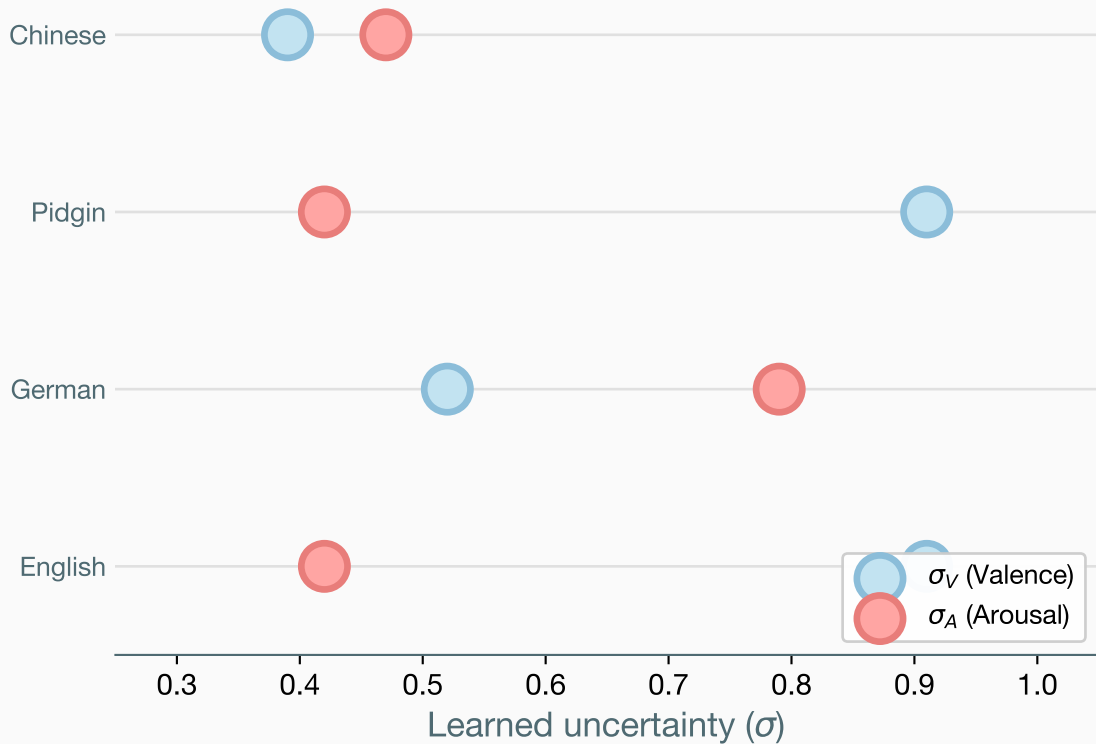

Supplement: SupplementaryMaterial [file variant_dotplot.pdf › figures/variant_dotplot.pdf]

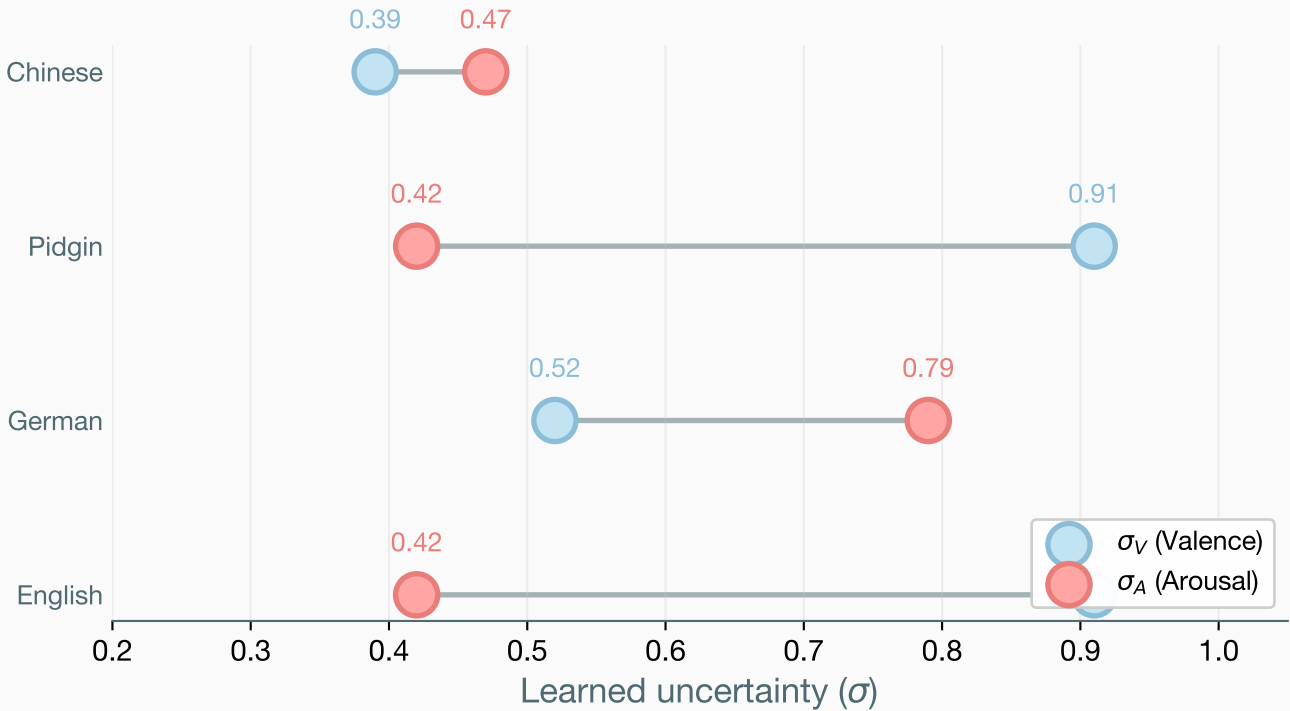

Supplement: SupplementaryMaterial [file variant_dumbbell.pdf › figures/variant_dumbbell.pdf]

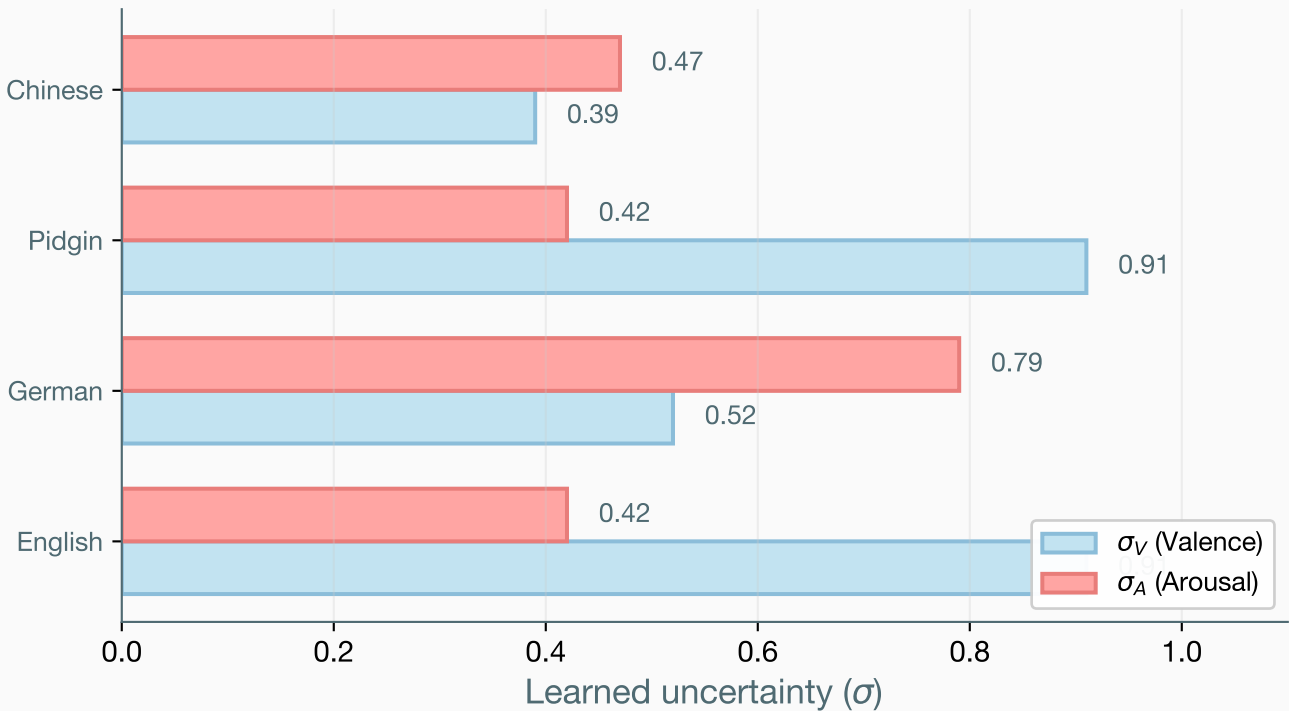

Supplement: SupplementaryMaterial [file variant_horizontal.pdf › figures/variant_horizontal.pdf]

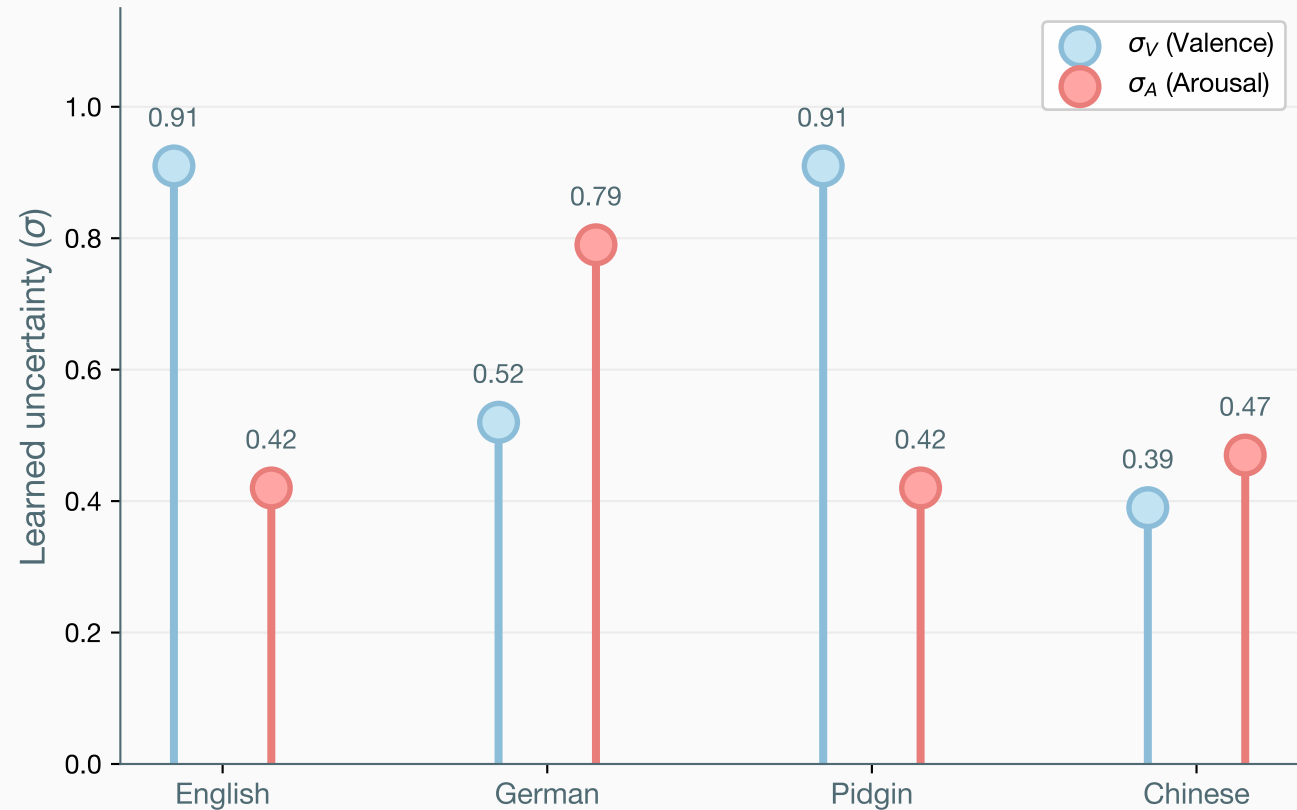

Supplement: SupplementaryMaterial [file variant_lollipop.pdf › figures/variant_lollipop.pdf]

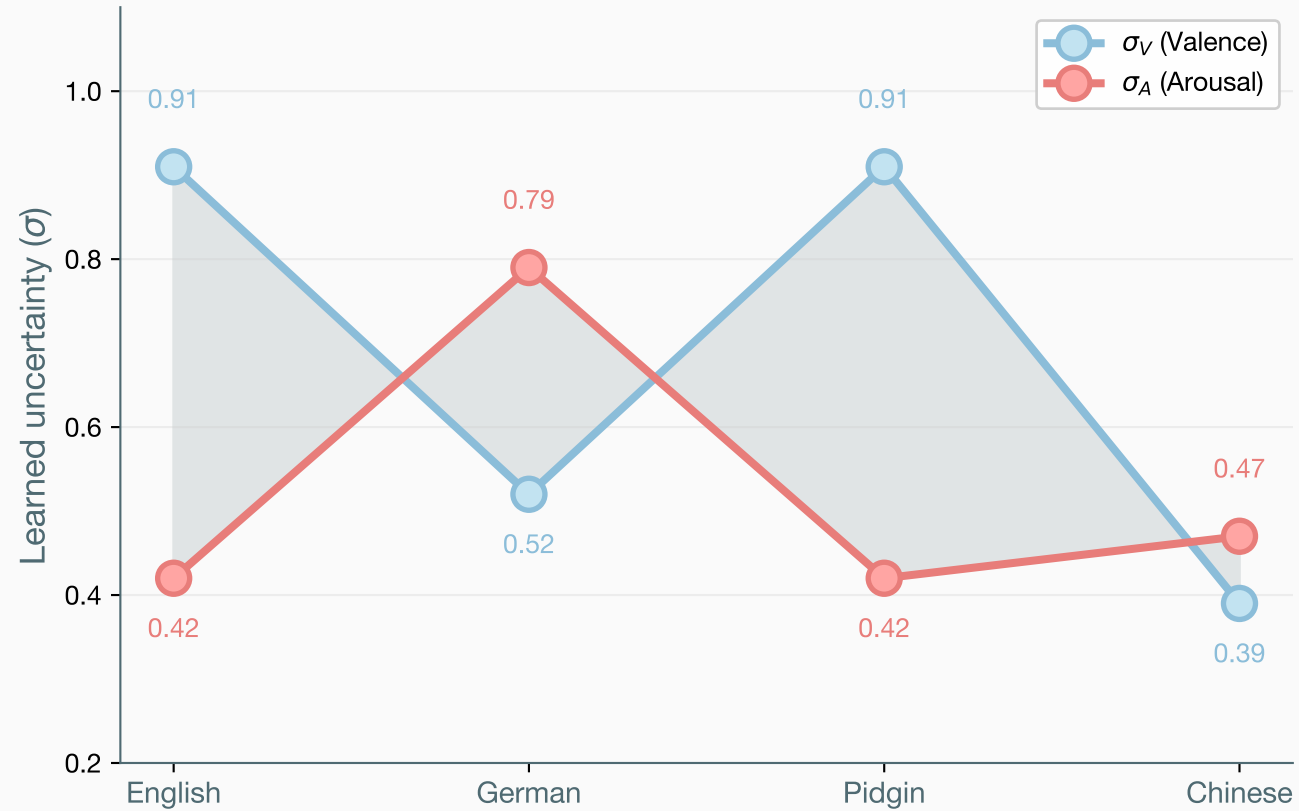

Supplement: SupplementaryMaterial [file variant_slope.pdf › figures/variant_slope.pdf]
